# Supplementary material for: Stacking pattern effect on the energy storage performance of PLZT-based relaxor- ferroelectric/antiferroelectric multilayer thin film capacitors prepared by sol-gel methods
Source: Research Square preprint supplement (doi:10.21203/rs.3.rs-7912657/v1), 2025-11-13
Supplement: Supplementary file 1 [file 40fcd40831a61b45a0c1e000.docx]

**Stacking pattern effect on the energy storage performance of relaxor-ferroelectric/antiferroelectric PLZT-based multilayer film capacitors prepared by sol-gel methods**

Chang Gao1#, Lijuan Huang1#, Qi Liu2, Shize Wu3, Zedong Xu4,Chunlin Zhao1, Xiao Wu1, Min Gao1*, Cong Lin1*

*1 College of Materials Science and Engineering, Fuzhou University, Fuzhou 350108, China*

*2 Department of Physics, Southern University of Science and Technology, Shenzhen 518055, China*

*3 School of Materials Science and Engineering, Tiangong University, Tianjin 300387, China.*

*4 Institute of Quantum Materials and Devices, School of Electronics and Information Engineering, Tiangong University, Tianjin 300387, China.*

#Chang Gao and Lijuan Huang are co-first authors of the article.

*Corresponding authors


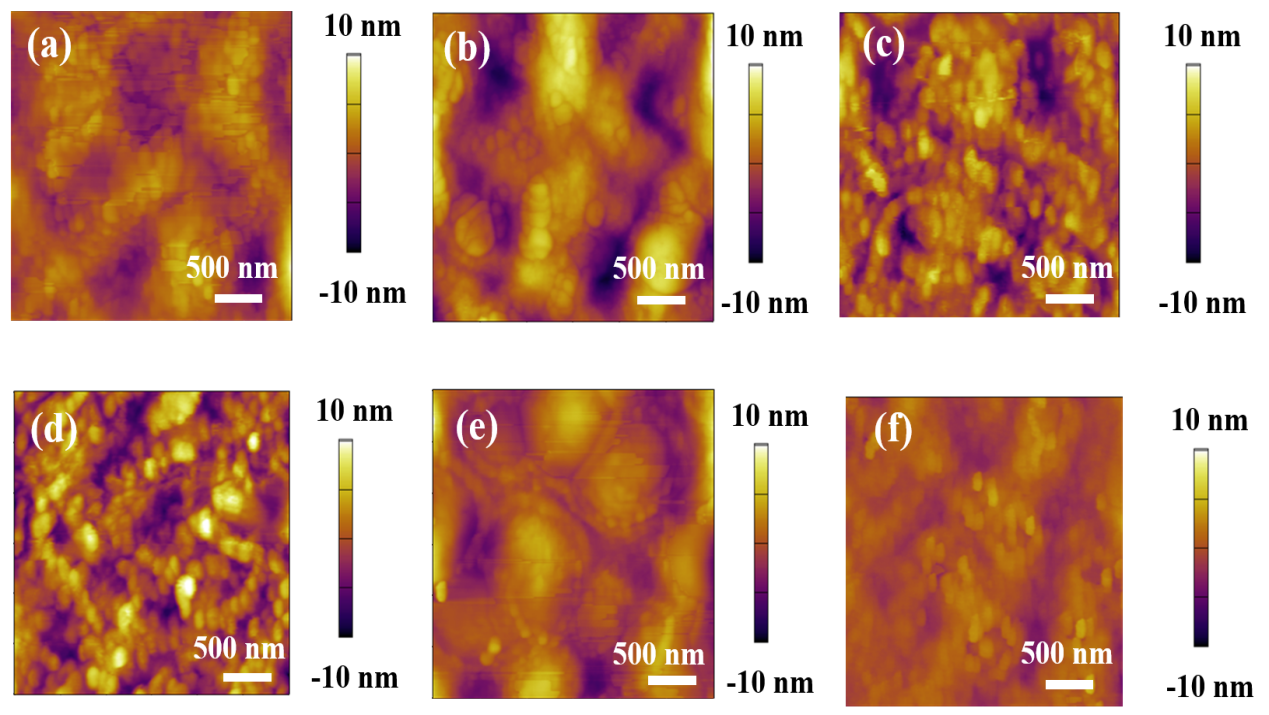


**Figure S1.** AFM height image of the (a) R6, (b) A6, (c) (RA)3, (d) (RA)2, (e) (RAA)2, and (f) (RAAA)2.


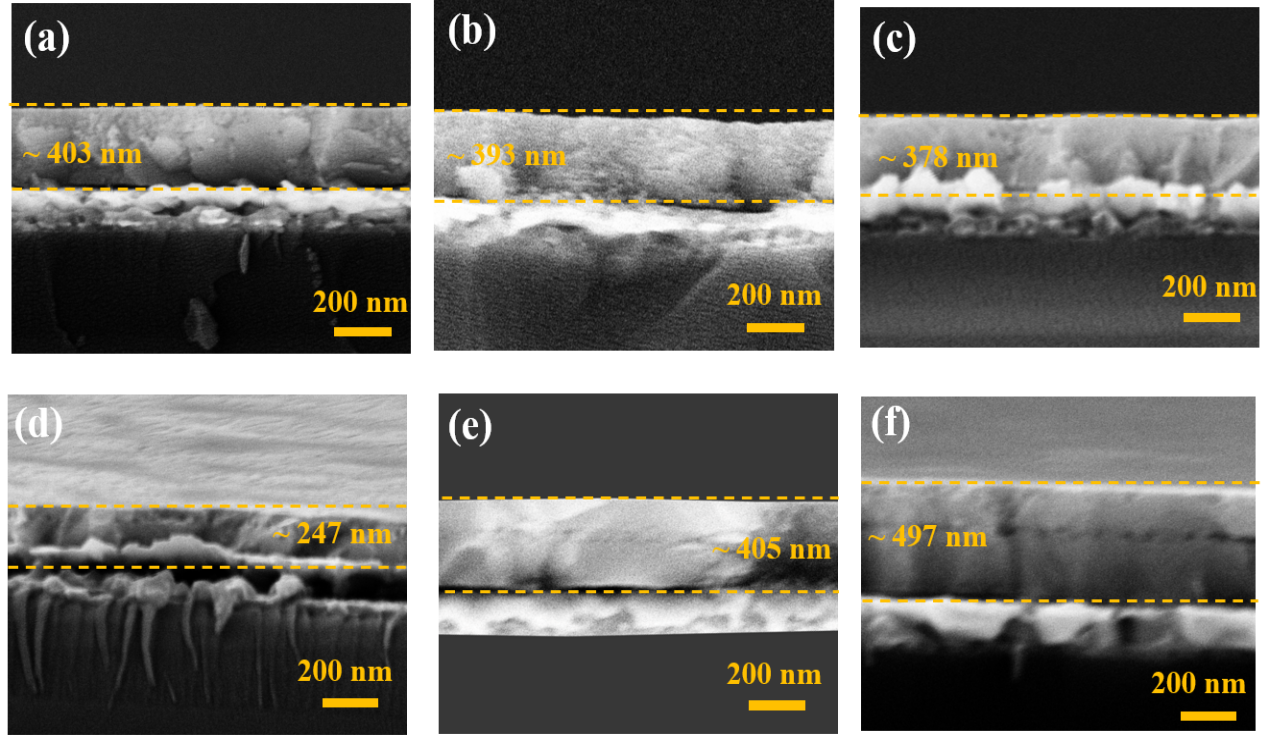


**Figure S2.** Cross-sectional SEM images of the (a) R6, (b) A6, (c) (RA)3, (d) (RA)2, (e) (RAA)2, and (f) (RAAA)2.


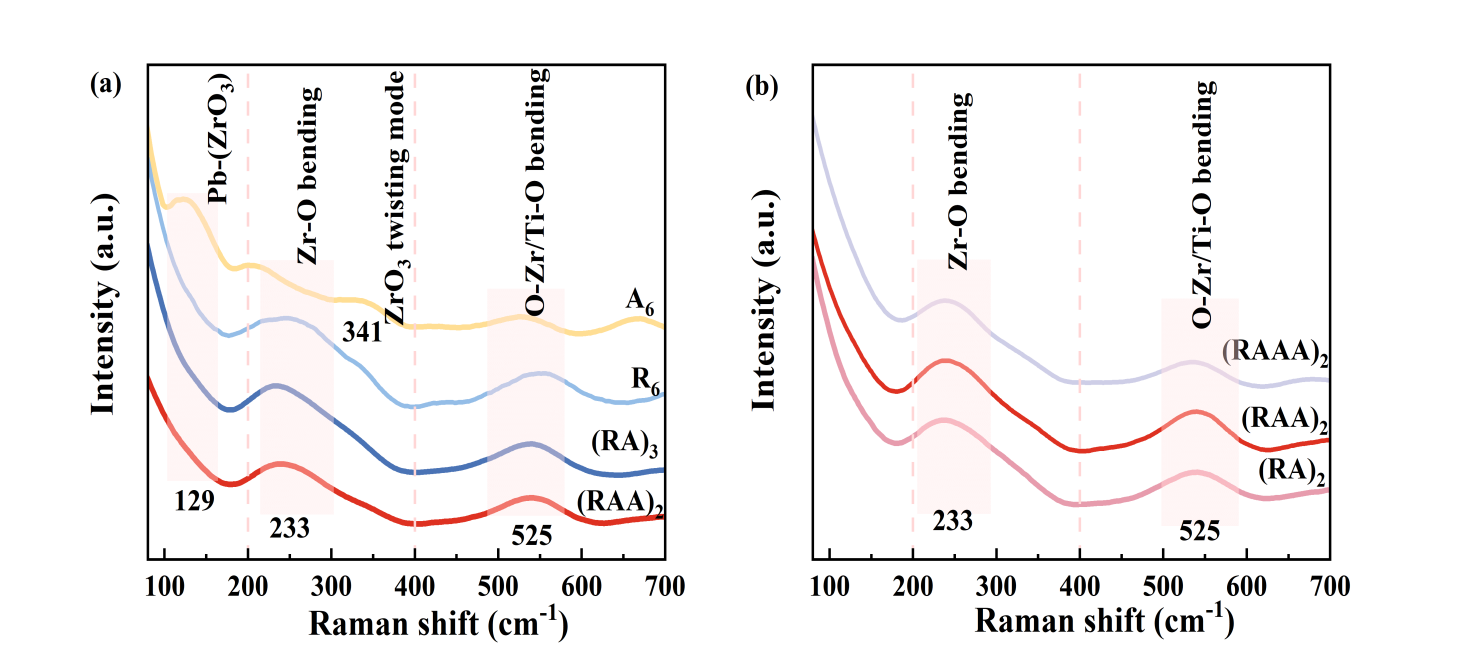


**Figure S3.** Raman spectrums of all samples. (a) A6, R6, (RA)3, and (RAA)2, (b) (RA)2, (RAA)2, (RAAA)2.
